# Supplementary figures and images for: Application and characterization of a novel PVDF-HFP/PVP polymer composite with MoO3 nanowires as a protective coating for wood
Source: Research Square preprint supplement (doi:10.21203/rs.3.rs-2198764/v1), 2022-11-03

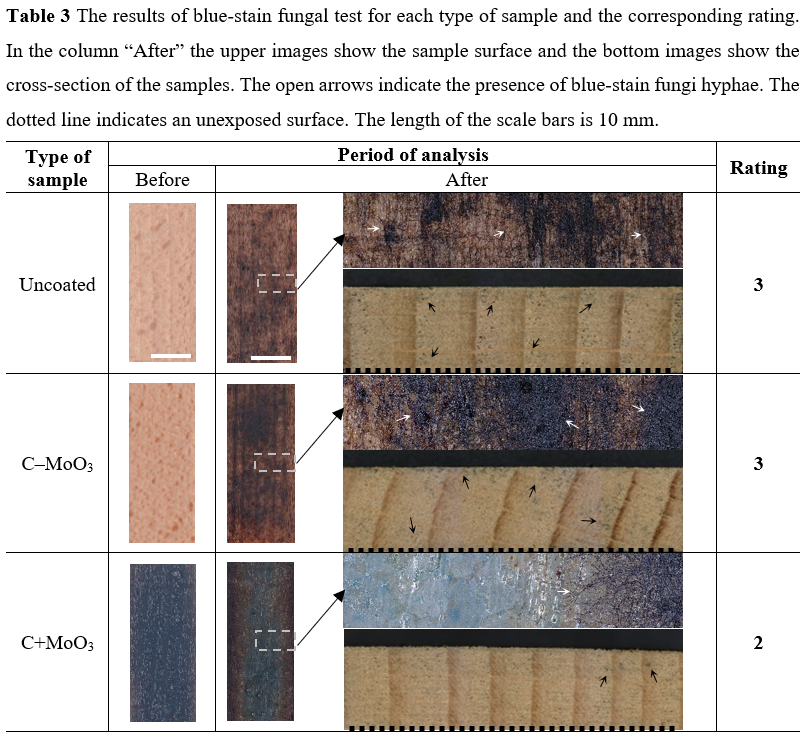

Supplement: Supplementary file 1 [file 50bc7be823718b1325d8499d.docx]

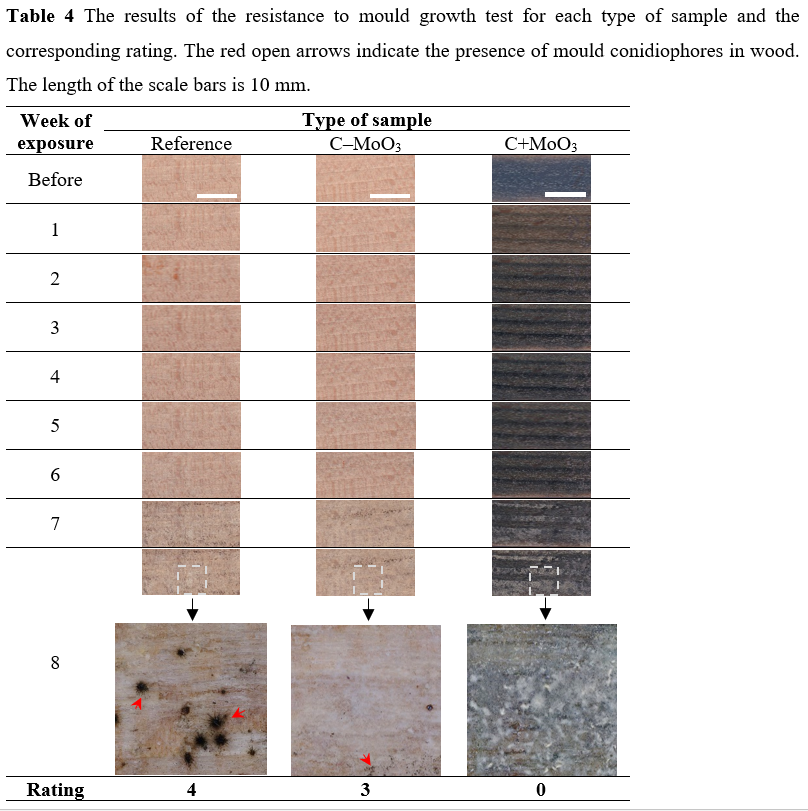

Supplement: Supplementary file 2 [file 5a8abb4846e049d59a3769ff.docx]

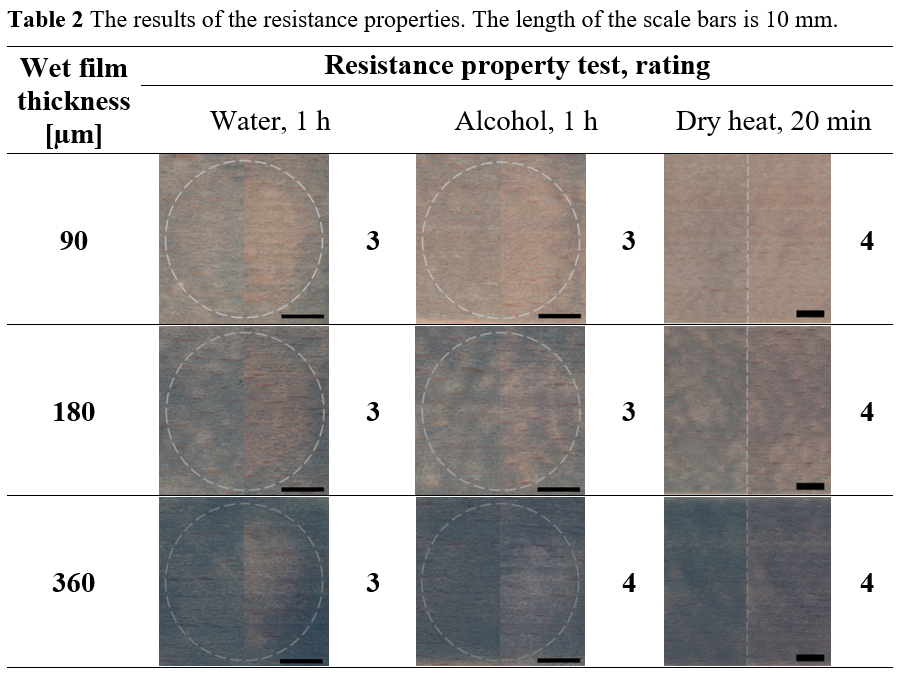

Supplement: Supplementary file 3 [file 7dbcc9a61753e6cf2b34a03a.docx]
